# Supplementary material for: Chiral amplification induced by self-assembly of different aggregation states in liquid crystal block copolymer films with chiral response
Source: Royal Society of Chemistry journal article supplement (doi:10.1039/d3ma00103b), 2023-01-01
Supplement: d3ma00103b1.pdf [file d3ma00103b1.pdf]

## Supporting Information

# Chiral Amplification Induced by Self-Assembly of Different Aggregation States in Liquid Crystal Block Copolymer Films with Chiral Response

Jianan Yuan,<sup>b</sup> Xuemin Lu,<sup>\*a</sup> Xiaojie He,<sup>b</sup> Feng Zheng,<sup>b</sup> and Qinghua Lu<sup>\*a</sup>

<sup>a</sup> School of Chemistry and Chemical Engineering, Shanghai Jiao Tong University, Shanghai, 200240, China. E-mail: [xueminlu@sjtu.edu.cn](mailto:xueminlu@sjtu.edu.cn), [qhlu@sjtu.edu.cn](mailto:qhlu@sjtu.edu.cn).

<sup>b</sup> School of Chemical Science and Engineering, Tongji University, Shanghai, 200092, China.

## Results and Discussion

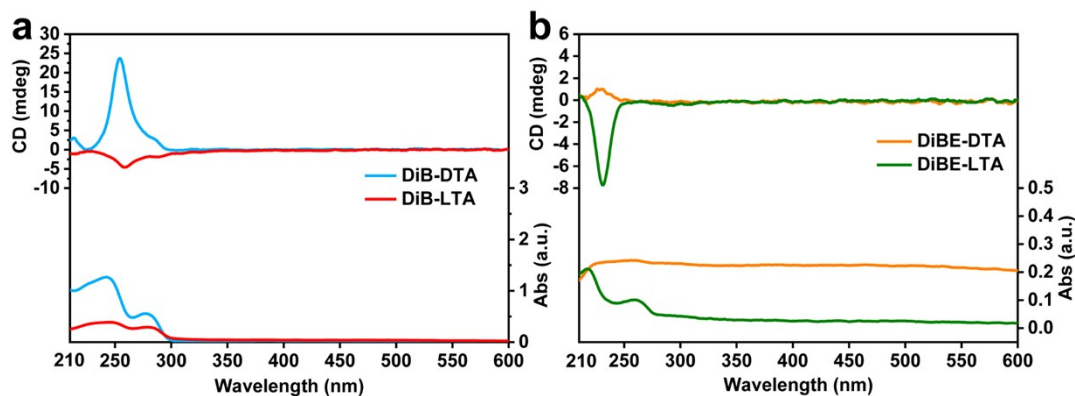

**Figure S1.** CD and UV-vis spectra of (a) DiB-D/LTA films and (b) DiBE-D/LTA.

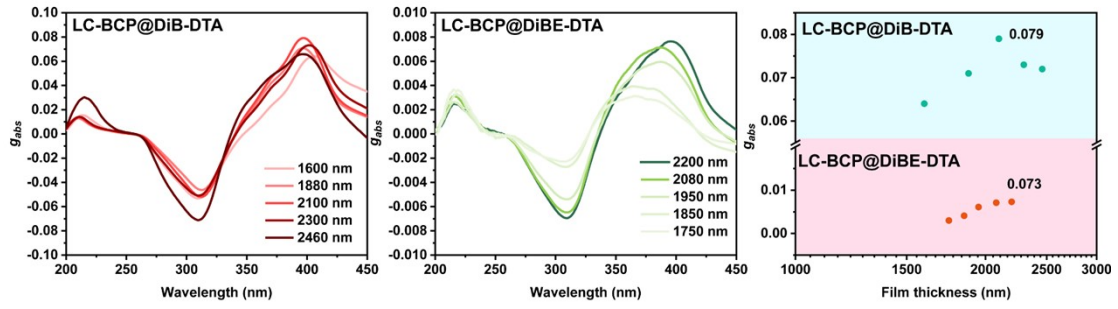

**Figure S2.**  $g_{abs}$  of LC-BCP@DiB-DTA annealed film and LC-BCP@DiBE-DTA annealed film with different thickness.

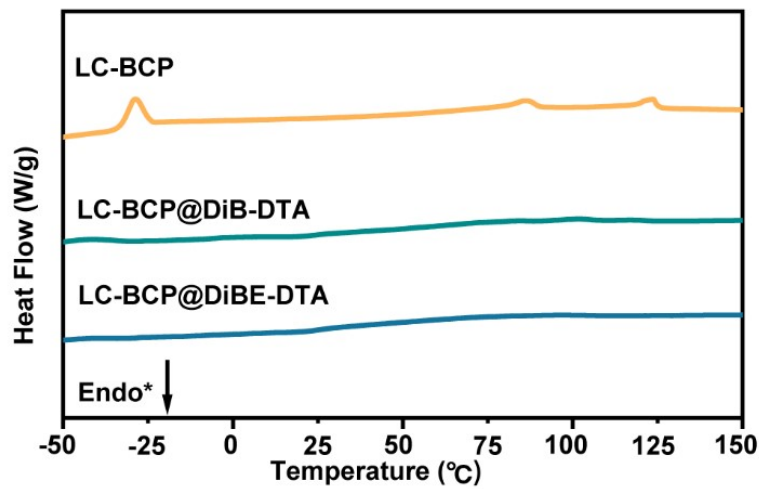

**Figure S3.** DSC cooling curve of LC-BCP, LC-BCP@DiBE-DTA, and LC-BCP@DiB-DTA.

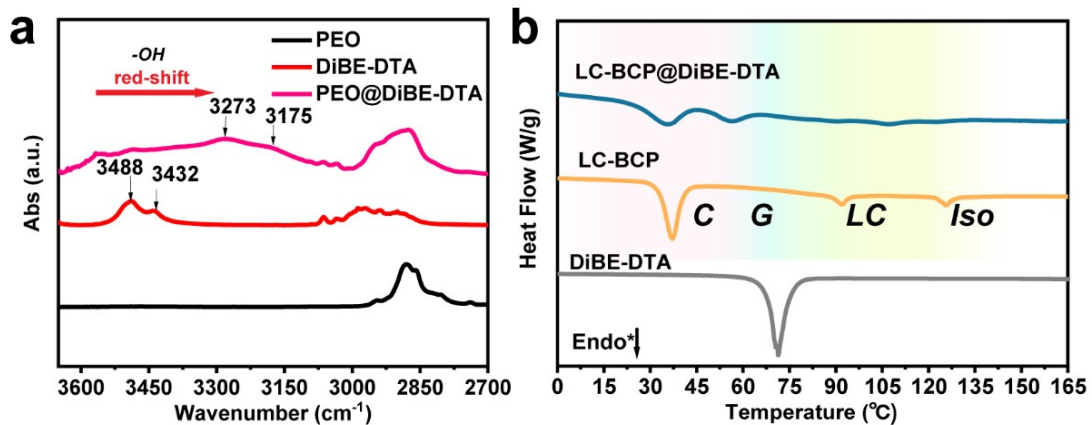

**Figure S4.** (a) IR spectrum of PEO, DiBE-DTA, and PEO@DiBE-DTA, respectively. The two peaks of -OH group of chiral molecules are red shift. (b) DSC heating curve of LC-BCP, DiBE-DTA, and LC-BCP@DiBE-DTA; C: crystalline phase; G: glass transition; LC: liquid crystal phase; Iso: isotropic phase.

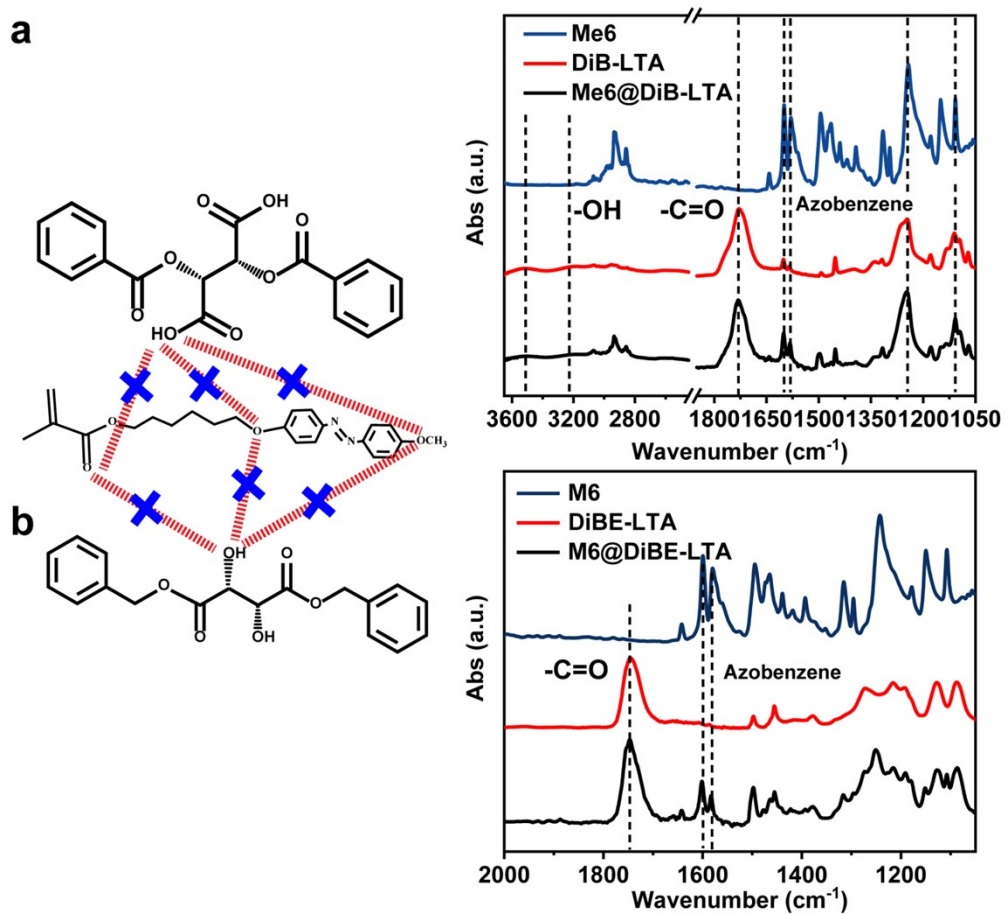

**Figure S5.** (a) IR spectrum of Me6, DiB-LTA, and Me6@DiB-LTA. (b) IR spectrum of Me6, DiBE-LTA, and Me6@DiBE-LTA.

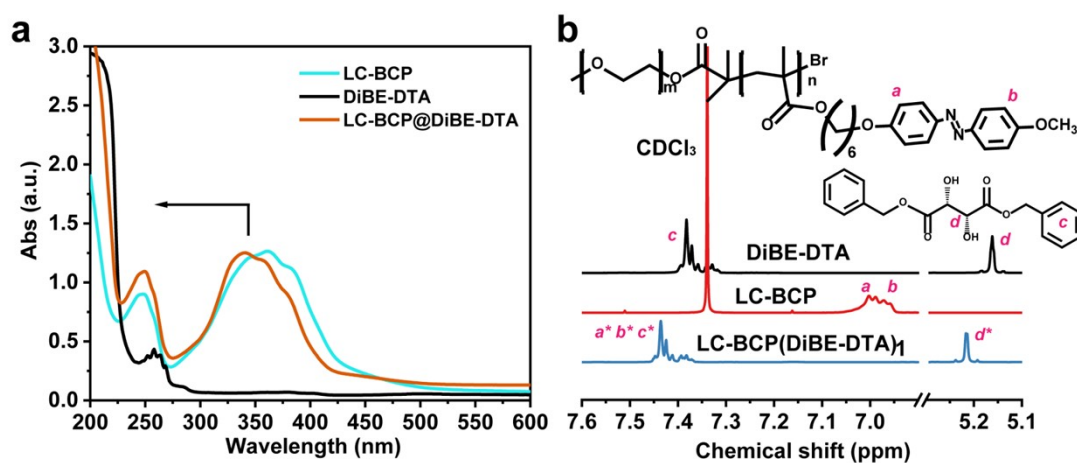

**Figure S6.** (a) UV-vis spectra of LC-BCP, DiBE-DTA, and LC-BCP@DiBE-DTA, (b) NMR spectra of LC-BCP, DiBE-DTA, and LC-BCP@DiBE-DTA with a molar ratio of 1.

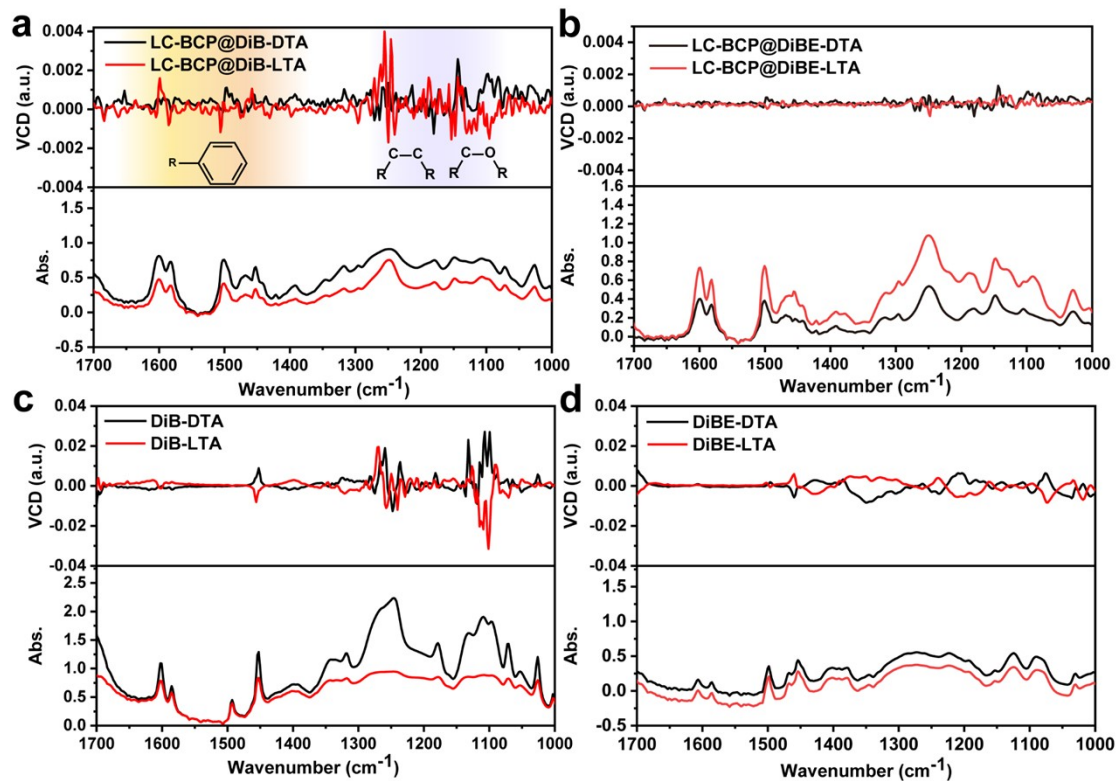

**Figure S7.** VCD spectra of LC-BCP@DiBE-D/LTA films (a), LC-BCP@DiBE-D/LTA films (b), DiB-D/LTA (c), DiBE-D/LTA (d).

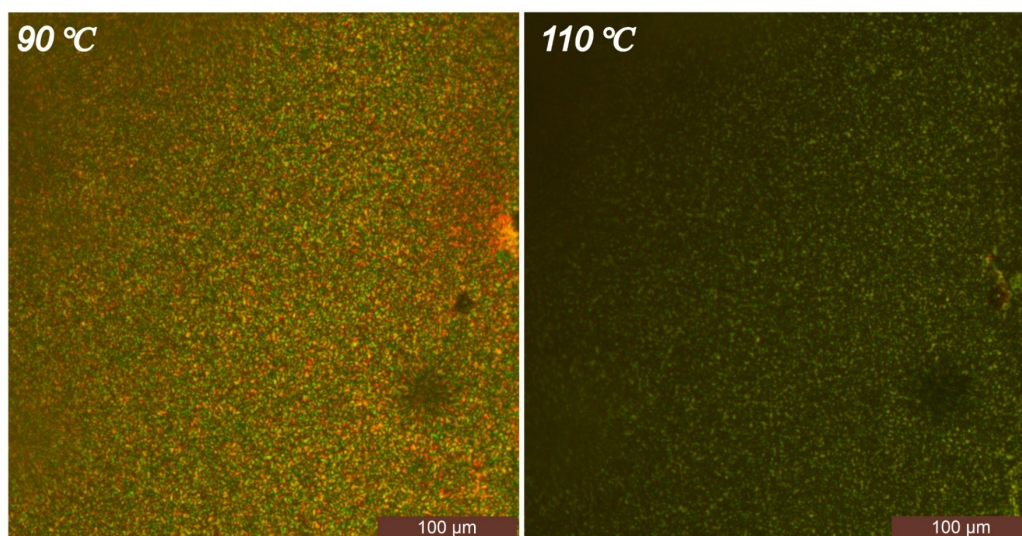

**Figure S8.** POM of LC-BCP@DiBE-DTA at 90 °C (left) and 110 °C (right).

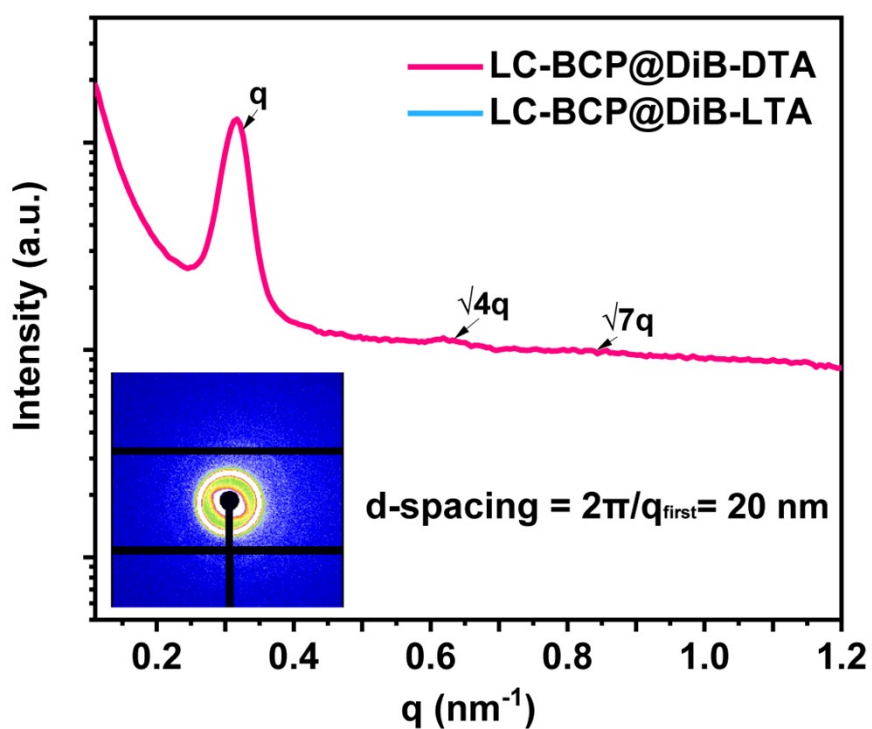

**Figure S9.** SAXS profiles of the annealed LC-BCP@DiB-DTA films. The image on the bottom is a two-dimensional diagram of SAXS.

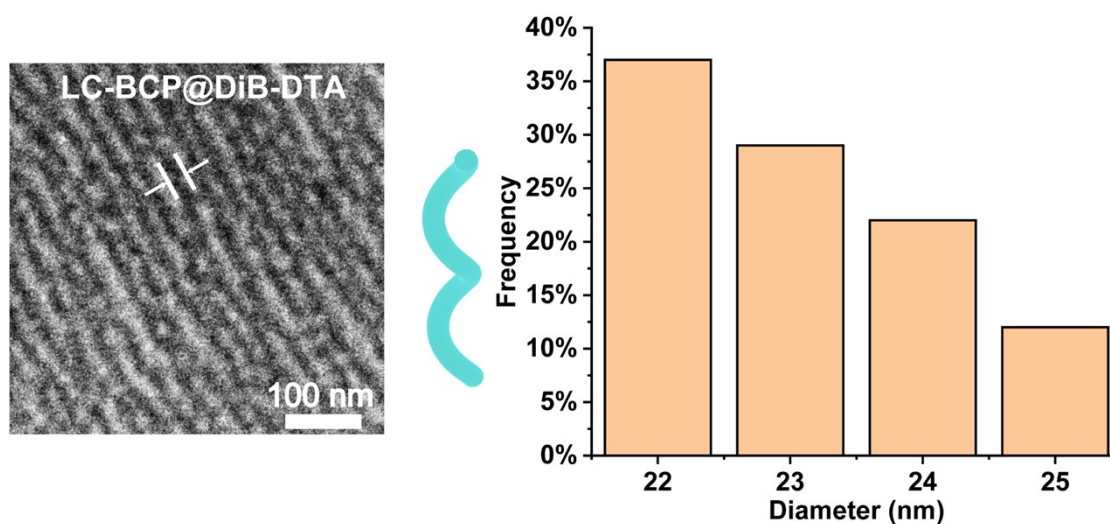

**Figure S10.** Bright-field images of LC-BCP@DiB-DTA films. The image on the right represents the helical diameter distribution.

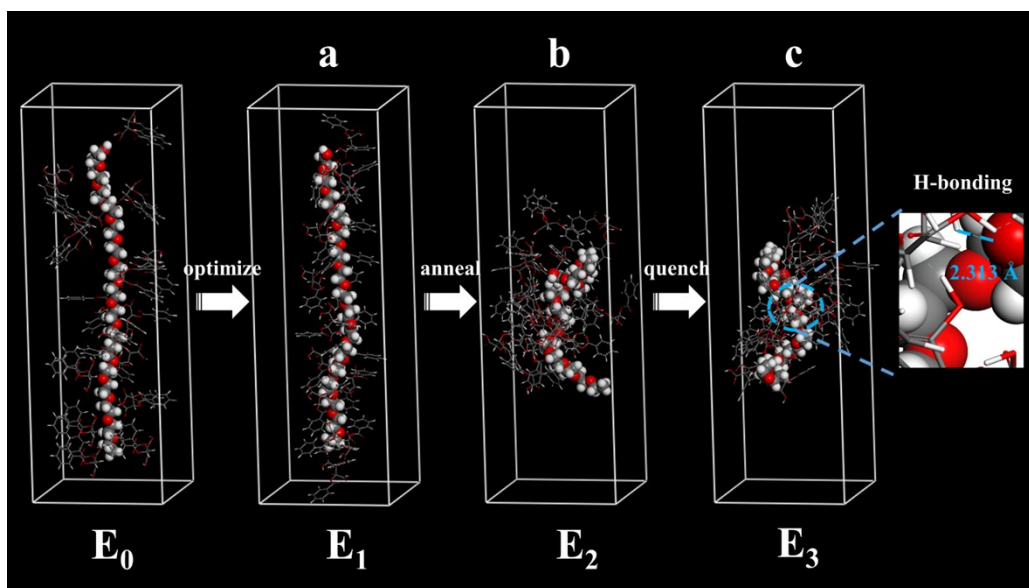

**Figure S11.** Energy-optimized structure (a), NVT and NPT annealing dynamic simulation (b), and quenching dynamic simulation (c). The inner diagram shows the H-bonding between the carboxyl group of the chiral molecule and PEO.

All dynamic simulations were performed in the Forcite module with the COMPASS II force field.<sup>1</sup> To further explore the chiral induction mechanism of PEO@DiBTA, the PEO-DiBTA model was generated using the Amorphous Cell module.<sup>2</sup> To eliminate unreasonable local structures, the geometric optimization of the model used smart algorithms, and the maximum interaction was 50,000 steps. After 300 ps restricted NVT and 300 ps NPT pre-equilibrium, NVT annealing dynamic was performed with 15 cycles from 298 K to 398 K, and an annealing time of 600 ps. The temperature was held by a Nose-Hoover thermo-stat.<sup>3</sup> All snapshots of the configurations were taken from the last 10 ps of simulation. The helical structure appeared locally, which was consistent with the experimental results. Then, a 400 ps quenching dynamic simulation was performed to obtain a more regular helical conformation. Inspired by the energy differences during the conformational changes of the small molecules<sup>4</sup> and the energies during changes in the mechanical behaviors of macromolecules,<sup>5</sup> we estimated different models based on the changes in the total energy. The helical conformation remained relatively stable.<sup>6,7</sup>

**Table S1.** Comparisons of energies during different steps of the dynamic simulation.

| structure | Random<br>$E_0$ | Simple optimized<br>structure<br>$E_1$ | Annealing<br>intermediate<br>state<br>$E_2$ | Quenching steady<br>state<br>$E_3$ |
|-----------|-----------------|----------------------------------------|---------------------------------------------|------------------------------------|
| PEO@DiBTA | 7883.38         | 100.03                                 | 237.07                                      | -152.94                            |

Units: kcal/mol

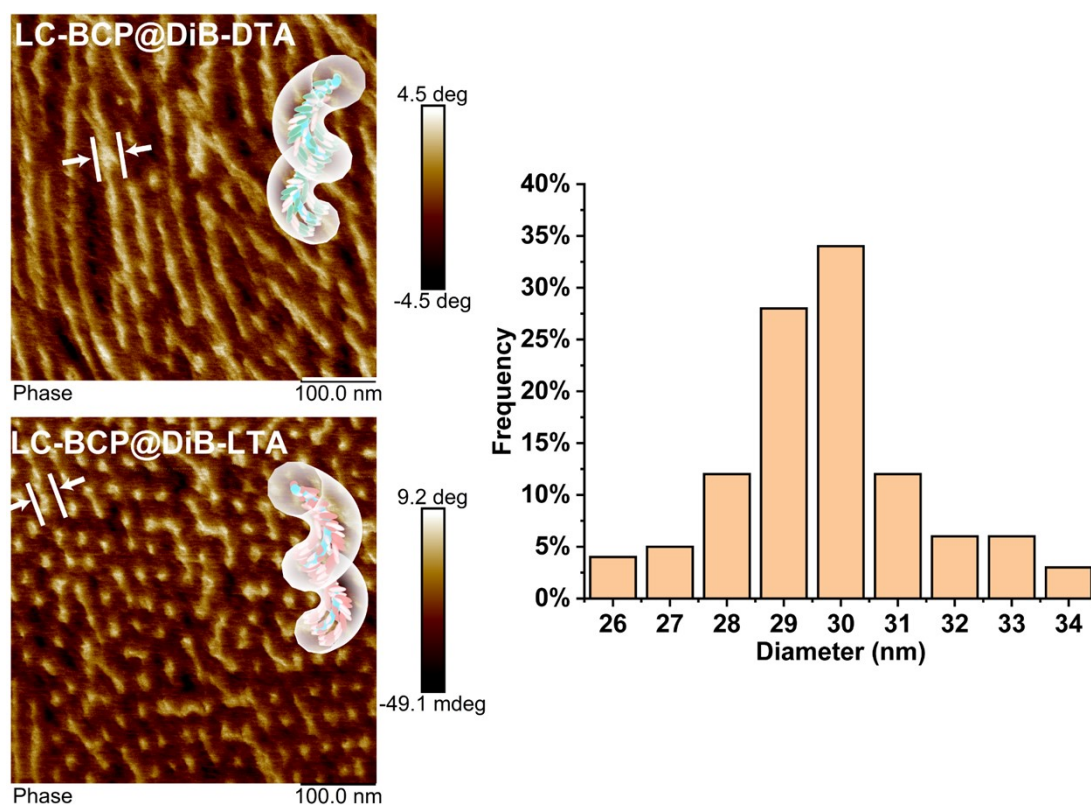

**Figure S12.** AFM phase images of LC-BCP films loaded with DiB-DTA and DiB-LTA. The picture on the right represents the helical diameter distribution.

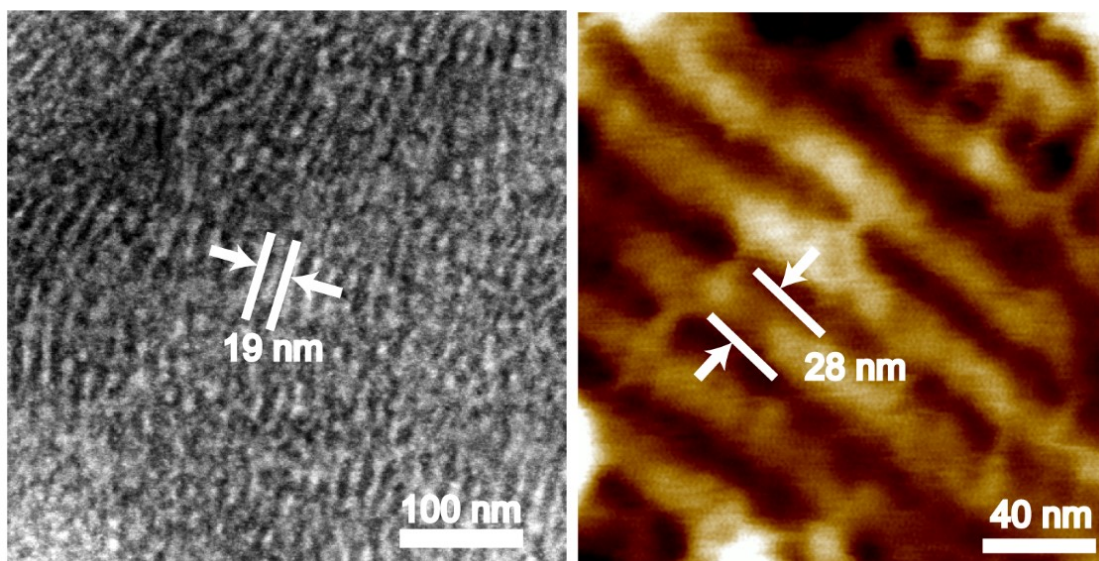

**Figure S13.** TEM and AFM images of LC-BCP@DiBE-DTA films.

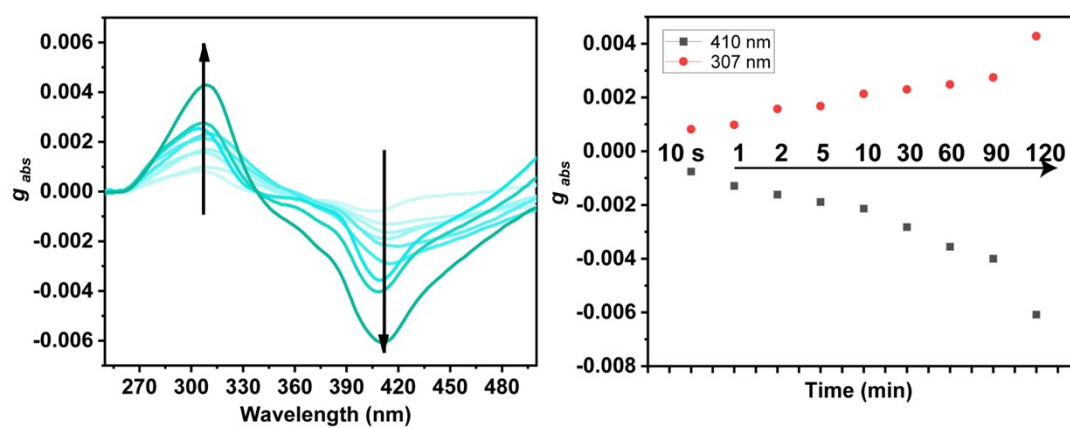

**Figure S14.**  $g_{abs}$  spectrum of LC-BCP@DiB-LTA.



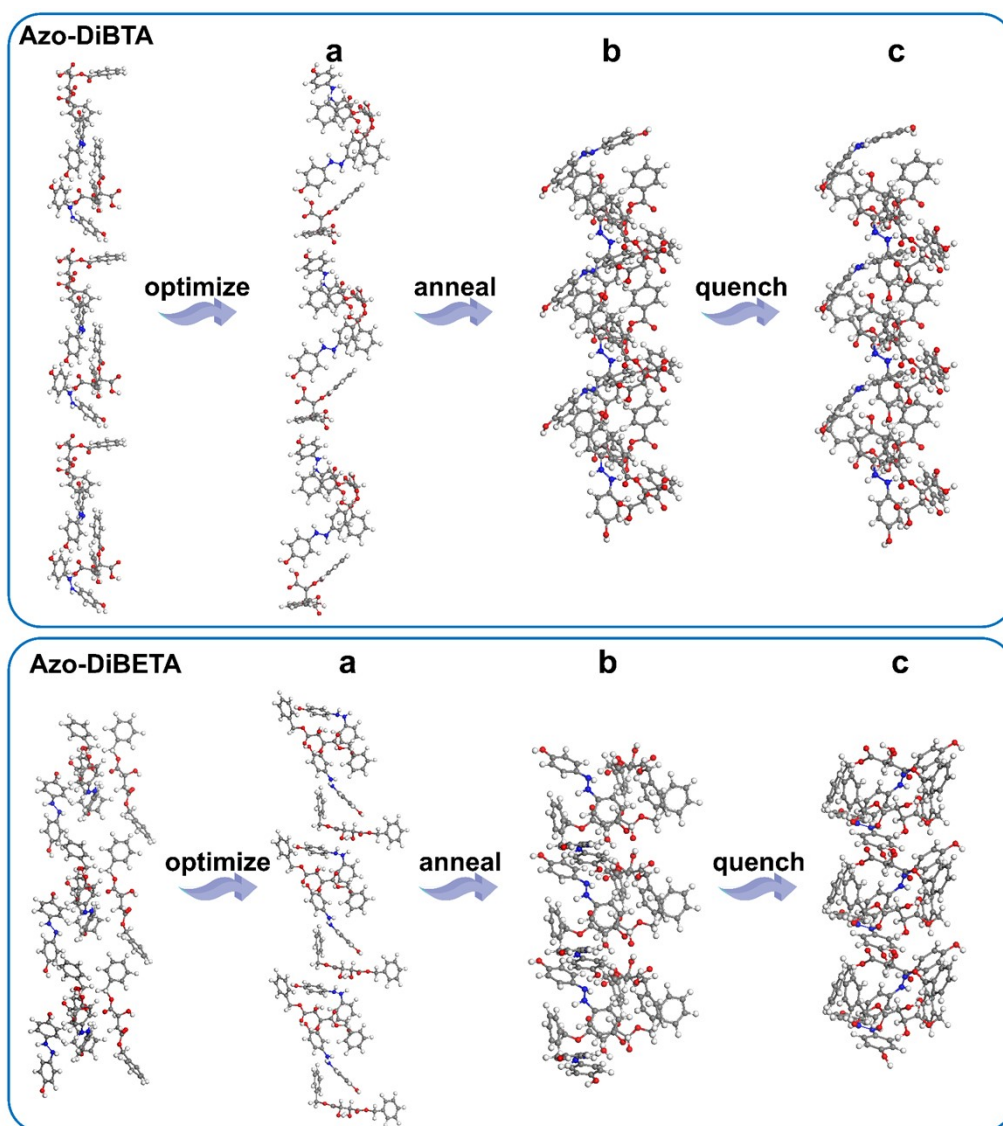

**Figure S15.** Energy-optimized structure (a), NVT and NPT annealing dynamic simulation (b), and quenching dynamic simulation (c).

## References

1. H. Sun, Z. Jin, C. Yang, R. L. C. Akkermans, S. H. Robertson, N. A. Spenley, S. Miller and S. M. Todd, *Journal of molecular modeling*, 2016, **22**, 47.
2. Y. Fu, L. Liao, L. Yang, Y. Lan, L. Mei, Y. Liu and S. Hu, *Molecular Simulation*, 2013, **39**, 415-422.
3. D. J. Evans and B. L. Holian, *The Journal of Chemical Physics*, 1985, **83**, 4069-4074.
4. A. Abe, R. L. Jernigan and P. J. Flory, *Journal of the American Chemical Society*, 1966, **88**, 631-639.
5. Q. L. Xiong and S. A. Meguid, *European Polymer Journal*, 2015, **69**, 1-15.
6. A. Mazzanti and D. Casarini, *WIREs Computational Molecular Science*, 2012, **2**, 613-641.
7. R. S. Giri and B. Mandal, *CrystEngComm*, 2022, **24**, 10-32.
